# 1 Transcriptome atlas of *Phalaenopsis equestris*

2  
3 Anna V. Klepikova<sup>1</sup>, Artem S. Kasianov<sup>1</sup>, Margarita A. Ezhova<sup>1</sup>, Aleksey A. Penin<sup>1,2</sup>, Maria D.  
4 Logacheva<sup>1,2,3</sup>

5  
6 <sup>1</sup> Laboratory of Plant Genomics, Institute for Information Transmission Problems of the Russian  
7 Academy of Sciences, Moscow, Russia

8 <sup>2</sup> Faculty of Biology, Lomonosov Moscow State University, Moscow, Russia

9 <sup>3</sup> Center of Life Sciences, Skolkovo Institute of Science and Technology, Moscow, Russia

10

11 Corresponding Author:

12 Anna V. Klepikova<sup>1</sup>

13 Bolshoy Karetny per. 19, build. 1, Moscow 127051, Russia

14 Email address: annklepikova@gmail.com

15

## 16 Abstract

17 The vast diversity of Orchidaceae together with sophisticated adaptations to pollinators and other  
18 unique features make this family an attractive model for evolutionary and functional studies. The  
19 sequenced genome of *Phalaenopsis equestris* facilitates Orchidaceae research. Here we present  
20 an RNA-seq based transcriptome map of *P. equestris* which covers 19 organs of the plant  
21 including leaves, roots, floral organs and shoot apical meristem. We demonstrated the high  
22 quality of the data and showed the similarity of *P. equestris* transcriptome map with gene  
23 expression atlases of other plants. The transcriptome map can be easily accessed through our  
24 database Transcriptome Variation Analysis (TraVA) visualizing gene expression profiles. As an  
25 example of the application we analyzed the expression of *Phalaenopsis* “orphan” genes – the  
26 ones that do not have recognizable similarity with genes of other plants. We found that about a  
27 half of them are not expressed; the ones that are expressed have a predominant expression  
28 pattern in reproductive structures.

29

## 30 Introduction

31 The enormous diversity of orchids traditionally attracts attention of plant biologists. Orchidaceae  
32 comprises about 25 thousand of species, which makes it the largest plant taxon (Cai et al., 2015).

33 The diversification of orchids has evolved along with complex pollinator-adapted flower  
34 structure (Cozzolino & Widmer, 2005), CAM-photosynthesis and epiphytism (Silvera et al.,  
35 2009).

36 Genome assembly of *Phalaenopsis equestris* (the horse phalaenopsis) (Cai et al., 2015) provided  
37 novel opportunities for evolutionary and functional studies of Orchidaceae. Genome assembly  
38 was used for the functional studies of transcription factor families (Lin et al., 2016; Valoroso et  
39 al., 2019), somatic embryogenesis (Chen et al., 2019), retrotransposon insertions (Hsu et al.,  
40 2019), as well as for evolutionary studies of ancient polyploidy (Barrett et al., 2019). However,

41 transcriptome resources of *P. equestris* remain limited even though the de novo transcriptome  
42 assembly was performed based on RNA sequencing of 11 organs (Niu et al., 2016).  
43 In our study we present a transcriptome map of *P. equestris* consisting of 19 samples in two  
44 biological replicates. High-quality RNA of orchid organs and tissues was sequenced using  
45 Illumina technology resulting in 1 687 M reads. We compared expression characteristics of  
46 *P. equestris* transcriptome map with gene expression atlases of other plants to provide evidence  
47 of reliability of our data. Transcriptome map of *P. equestris* can be applied in a great variety of  
48 functional studies.

49

## 50 **Materials & Methods**

### 51 **Growing conditions**

52 Plants were grown in a climate chamber under a 16 h light/8 h dark cycle at 22°C and 50–60%  
53 relative humidity. Samples were collected in two biological replicates; each replicate consists of  
54 at least seven plants. Sample collection was performed within two hours (Zeitgeber time ZT8-10)  
55 to reduce the influence of the circadian cycle.

### 56 **RNA extraction, library preparation and sequencing**

57 RNA was extracted using the RNeasy mini kit (Qiagen, The Netherlands) following the  
58 manufacturer's protocol. To ensure a high quality of *Phalaenopsis* samples, RNA was analyzed  
59 using capillary electrophoresis on Agilent Bioanalyzer 2100. cDNA libraries for Illumina  
60 sequencing were constructed using the NEBNext Ultra II RNA Library Prep Kit for Illumina  
61 (New England BioLabs, MA, USA) following the manufacturer's protocol in 0.5 of the  
62 recommended volume (due to low RNA quantity in such samples as shoot apical meristem).  
63 cDNA libraries were sequenced with the HiSeq4000 and NextSeq500 (Illumina, CA, USA)  
64 instruments (50 bp and 75 bp single read run).

### 65 **Read mapping**

66 Read trimming was performed using Trimmomatic version 0.36 (Bolger, Lohse & Usadel, 2014)  
67 in a single read mode and parameters "ILLUMINACLIP:common.adapters.file:2:30:10  
68 LEADING:20 TRAILING:20 SLIDINGWINDOW:4:15 MINLEN:30". For read mapping  
69 genome assembly and annotation of *P. equestris* from PLAZA database (version 4.5) was used.  
70 Trimmed reads mapped on the genome assembly using Spliced Transcripts Alignment to a  
71 Reference (STAR) version 2.4.2 (Dobin et al., 2013) in the "GeneCounts" mode and parameters  
72 "--sjdbOverhang 59 --sjdbGTFfeatureExon exon --sjdbGTFtagExonParentTranscript gene\_id" to  
73 obtain counts of uniquely mapped reads on each gene.

### 74 **Expression characteristics of transcriptome map**

75 Gene read counts obtained with STAR were normalized on library size using size factors, as  
76 described in (Anders & Huber, 2010). A threshold of five or higher normalized read counts in  
77 each biological replicate was used to define expressed genes.

78 To describe gene expression pattern Shannon entropy values were calculated for expressed in at  
79 least one sample genes (Schug et al., 2005). In order to avoid overrepresentation of certain plant  
80 organs, the samples were grouped using distances on clustering tree: gene expression levels were

81 averaged if samples had distance ( $1 - \text{Pearson } r^2$ ) less than 0.1. Sample groups are listed in Table  
82 S1.

### 83 **Data availability**

84 The RNA-seq raw data of transcriptome map were deposited in NCBI Sequence Read Archive  
85 (SRA) under BioProject accession PRJNA667255. The TraVA database can be accessed at  
86 [http://travadb.org/browse/Species=Phalaenopsis\\_equestris/](http://travadb.org/browse/Species=Phalaenopsis_equestris/).

87

## 88 **Results**

### 89 **Transcriptome map construction**

90 Ornamental orchid *P. equestris* comprises three varieties and numerous hybrids of various flower  
91 colors and sizes (Hsu & Chen, 2016). To create transcriptome atlas we chose *P. equestris* var.  
92 blue (orchidee.su) as clonal plants are available for the cultivar which helps to reduce  
93 interindividual variability. We have collected 31 samples covering main plant organs and  
94 developmental stages such as roots, young and mature leaves, floral organs, flower buds, and  
95 meristems. Each sample was collected in two biological replicates, and each replicate was pooled  
96 from at least seven plants. Sample RNA was sequenced on Illumina platform resulting in 29 M -  
97 65 M raw single reads (38 M median) for each sample (for sequencing statistics see Table S2).  
98 After removing low-quality reads and technical sequenced 98.7-99.8% of reads remained (Table  
99 S2).

100 Reads were mapped on the reference genome of *P. equestris* (Cai et al., 2015) with only one  
101 match allowed (unique mapping); 9.2-89.6% of high-quality reads were successfully mapped  
102 (Table S2). 12 samples showed extremely low percentage of read mapping; unmapped reads  
103 were identified as sequences belonging to Cymbidium mosaic virus (GenBank accession  
104 MK816927) which are known to persist in the majority of *P. equestris* population and affect  
105 mainly mature and senescent tissues (Koh, Lu & Chan, 2014). As the library size of infected  
106 samples was insufficient and can distort the conclusions we excluded samples with a percentage  
107 of mapped read lower than 35% in at least one biological replicate. The remained samples had  
108 37.3-89.6% of uniquely mapped reads with median of 81.6%.

109 Thus, we constructed a transcriptome map of *P. equestris* covering 19 organs and parts of the  
110 plant. Floral organs (anthers, labellum, inner and outer tepals), leaves at different developmental  
111 stages, axes (inflorescence and pedicel), shoot apical and inflorescence meristems, and root parts  
112 were taken into analysis (for detailed description of samples see Table S3). The biological  
113 replicates showed high consistency (median Pearson  $r^2 = 0.99$ , Table S4).

114 Clustering of samples generally reflects plant body plan and groups organs with similar  
115 morphology and physiology (Klepikova & Penin, 2019). Hierarchical clustering of *P. equestris*  
116 samples showed the same pattern (Fig. 1A). Sample clusters were formed by floral organs, leaf  
117 parts, meristems and young leaves, inflorescence internode and root; young and mature anthers  
118 were an outgroup for the other samples, similar to *A. thaliana*, rice, and maize (Nobuta et al.,  
119 2007; Wang et al., 2010; Stelpflug et al., 2016; Klepikova et al., 2016). The distances between  
120 samples on clustering tree were closer than in other species we observed (Klepikova et al., 2016;

121 Penin et al., 2019), which can be explained by the lack of older tissues in *P. equestris*  
122 transcriptome atlas.

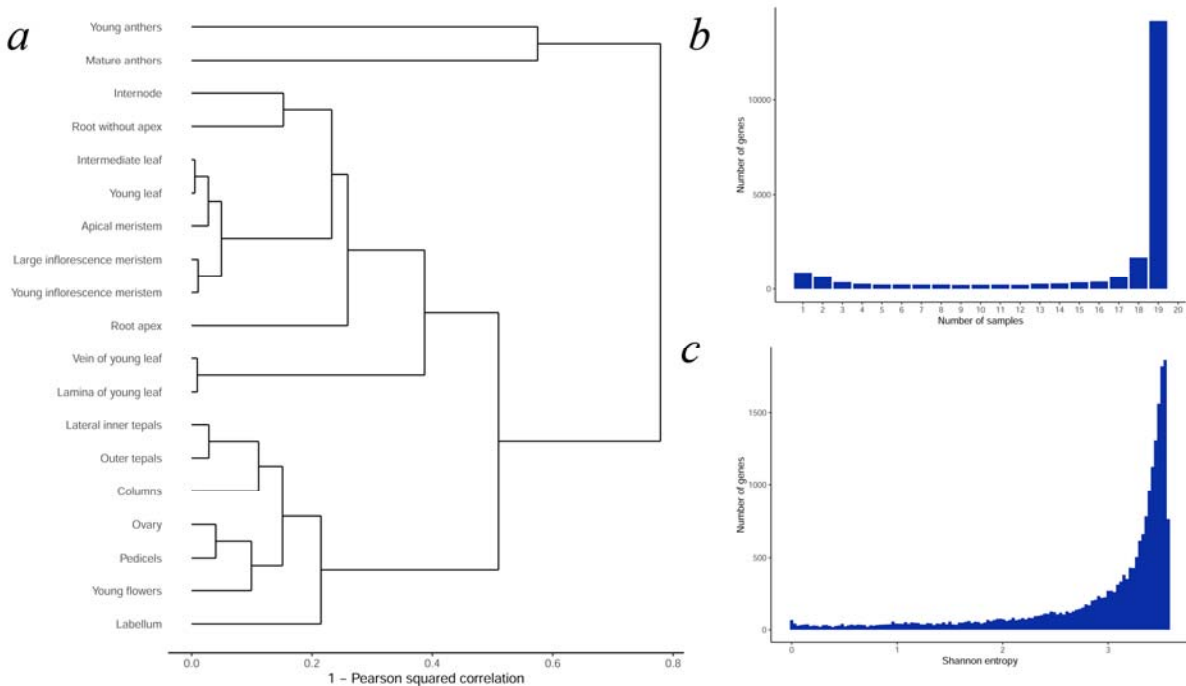

123  
124 **Figure 1.** Expression characteristics of the *P. equestris* transcriptome map: (a) Hierarchical  
125 clustering tree of transcriptome map samples; (b) The distribution of genes by the number of  
126 samples where gene is expressed. Only expressed genes with 5 or more normalized read counts  
127 in each biological replicate were considered; (c) The distribution of Shannon entropy of *P.*  
128 *equestris* genes.

129 We compare our samples with publicly available *P. equestris* transcriptomes (Table S5). In  
130 general, the clustering of samples was consistent (Fig. S1), though leaf and column from the  
131 BioProject PRJNA288388 (Niu et al., 2016) form outgroup to all other samples.

### 132 **Expression characteristics of *P. equestris***

133 *Phalaenopsis* genome annotation (PLAZA database, version 4.5) includes 29 431 protein-coding  
134 genes. Among them 14 174 (48%) genes were expressed in all samples (using five reads in each  
135 biological replicate as a threshold), when transcripts of 21 671 (74%) genes were found in at  
136 least one sample. These values are in the range of typical expressed gene numbers across plant  
137 transcriptome maps (Klepikova & Penin, 2019). As in other species, samples demonstrated  
138 similarity in the number of expressed genes, which varied from 15 612 (53%) in shoot apical  
139 meristem to 18 947 (64%) in ovules before pollination (Table S6).

### 140 **Expression patterns of *P. equestris* genes**

141 The study of gene expression pattern can shed light on the biological function of the gene and  
142 place it among essential for a plant existence ubiquitously expressed genes or precise regulators  
143 of tissue features – sample-specific expressed genes. We used two approaches to define gene  
144 expression patterns. A number of samples where gene is expressed is the simplest method to

145 characterize expression pattern width, as was shown for *Nicotiana tabacum* (Edwards et al.,  
146 2010) or *Vigna unguiculata* (Yao et al., 2016). The majority of genes (16 486) were expressed in  
147 17 or more samples; the second peak (1 896 genes) of the distribution is formed by genes  
148 expressed in 3 or less samples (Fig. 1B). The main patterns of tissue-specific genes were anthers  
149 (56% of tissue-specific genes), roots (11%), and meristems (both shoot apical and inflorescence  
150 meristem, 8%). The high number of anther-associated genes are known for *A. thaliana*  
151 (Klepikova et al., 2016) and is expected for *P. equestris* as young and mature anthers are the  
152 most distant samples on clustering tree (Fig. 1A).

153 While useful, such approach depends on an arbitrary threshold which separates expressed and  
154 non-expressed genes and does not take into account the variation of expression level between  
155 samples. To overcome the issue, we used Shannon entropy as a measure of expression pattern  
156 width: low entropy values correspond to tissue-specific genes, while high values mark  
157 ubiquitously expressed genes (Schug et al., 2005). The distribution of Shannon entropy in  
158 *P. equestris* was significantly skewed to the right revealing major part of wide-expressed genes  
159 (Fig. 1C) similarly to *A. thaliana*, *Solanum lycopersicum* and *Zea mays* (Sekhon et al., 2013;  
160 Klepikova et al., 2016; Penin et al., 2019).

161 Using Shannon entropy value lower than 0.25 we identified 521 tissue-specific genes. As in case  
162 of direct count the majority of genes was associated with anthers or roots (Fig. 2). According to  
163 GO enrichment, genes uniquely expressed in the mature anthers were involved in cell wall  
164 organization, biogenesis and modification and had pectinesterase and enzyme inhibitor activity  
165 (Table S7). Young anthers were characterized by genes encoding products with amine and amino  
166 acid binding activity (Table S8). Root-specific genes (expressed in the sample “Root without  
167 apex”) were described by terms “response to chemical stimulus”, “response to oxidative stress”,  
168 “oxidation reduction”, and “heme binding” (Table S9).

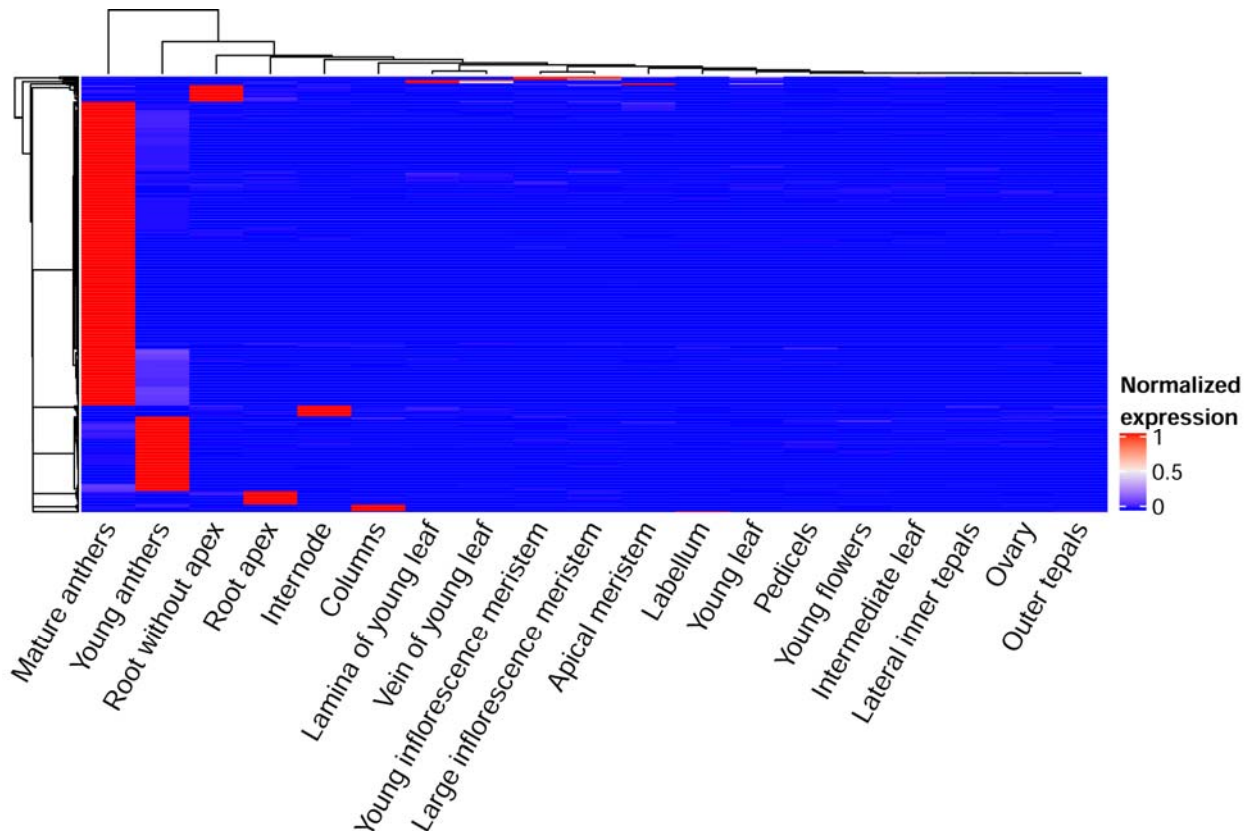

169

170 **Figure 2.** The heatmap of tissue-specific genes. Expression levels of each gene in each sample  
171 were normalized on its maximal expression level.

172 To find genes with opposite behaviour which uniformly expressed across tissues we selected  
173 genes with Shannon entropy 3.55 or higher and calculated coefficient of variance (CV) as a  
174 measure of expression stability. For 899 out of 1 340 genes CV was less than 0.25, indicating  
175 uniform expression in all samples and biological replicates. Stable genes had GO enrichment in  
176 terms associated with vesicles, membranes, RNA processing and localization. The list of GO  
177 categories strongly overlapped with the enrichment of *A. thaliana* uniformly expressed genes  
178 indicating inter-species universality of basic biological processes (Table S10).

### 179 ***P. equestris* Transcriptome Variation Database**

180 We aimed to make our transcriptome data easily accessible and ready to use, so we uploaded  
181 *P. equestris* transcriptomes into our database Transcriptome Variation Analysis (TraVA,  
182 [http://travadb.org/browse/Species=Phalaenopsis\\_equestris/](http://travadb.org/browse/Species=Phalaenopsis_equestris/)). TraVA interface demonstrates a  
183 color chart of gene expression profiles in a single- or multiple-gene view. A user can prefer to  
184 show or hide expression values in a chart and choose between several types of read count  
185 normalization (Fig. 3).

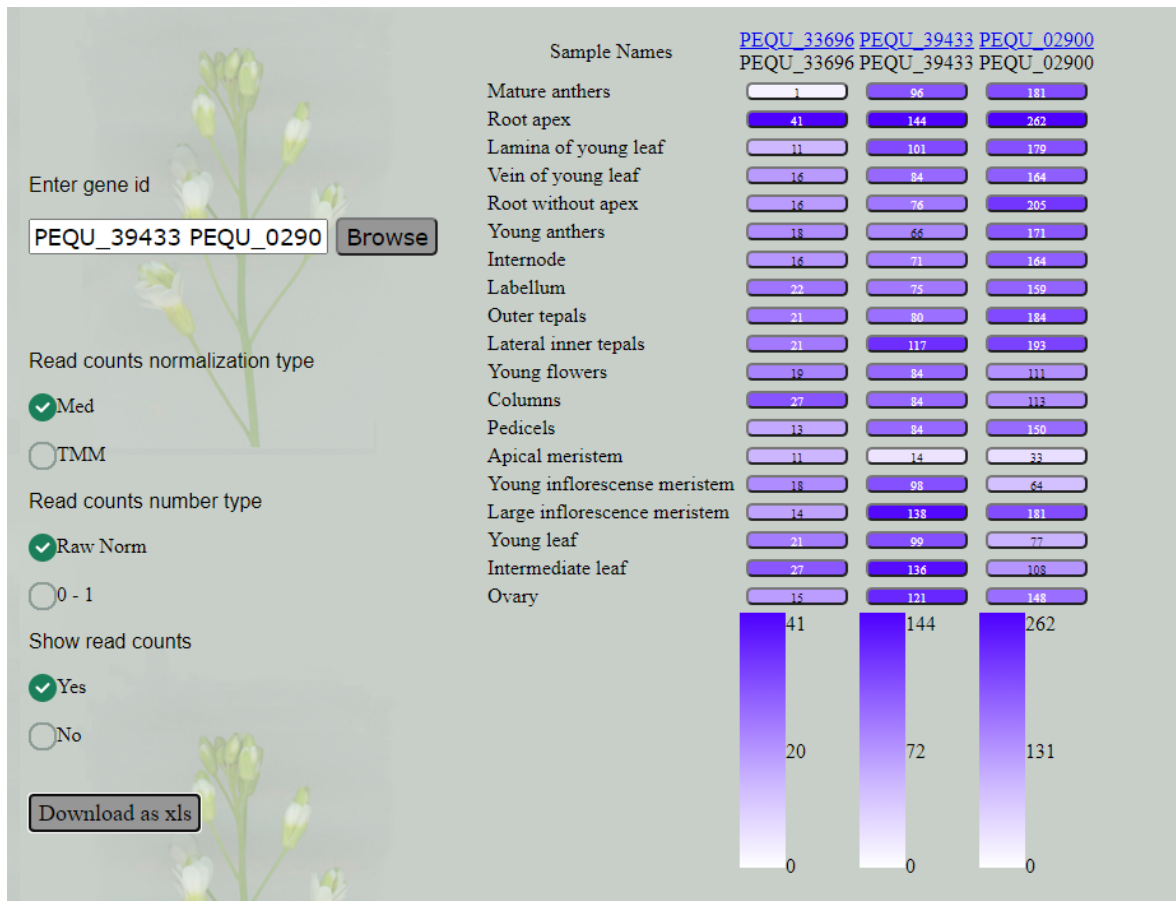

186

187 **Figure 3.** Database view.

188 **The application of the TraVA database to the characterization of orchid genes**

189 Graphical interface of TraVA facilitate gene expression patterns analysis and comparison and  
 190 can be widely used in *P. equestris* functional studies. Orchids are a large and highly diverse plant  
 191 family whose species adapted to a number of ecological niches (typical terrestrial plants,  
 192 epiphytes, non-photosynthetic plants). These adaptations reflect in their genome – for example,  
 193 *P. equestris* which has sophisticatedly differentiated perianth the number of *AP3* orthologs is  
 194 higher compared to *Apostasia schenzhenica*, the basal orchid species with undifferentiated  
 195 perianth. Vice versa, *P. equestris* which is an epiphyte and does not develop typical terrestrial  
 196 roots, lacks *AGL12* and several genes of the *ANR1* clade, in contrast to *A. schenzhenica*. This  
 197 stresses the importance of the study of lineage-specific genes and gene families. For the genes  
 198 that do not have orthologs in model species the analysis of the expression profiles is the first step  
 199 towards functional characterization.

200 We identified 181 (160 after filtering of the proteins that had X on more than 50% of length)  
 201 *P. equestris* proteins that do not have significant similarity to any *Arabidopsis* protein (e-value  
 202 cut-off = 10). Out of them 118 share similarity with the proteins of *A. schenzhenica* and are thus  
 203 presumably orchid-specific while 42 have no hits and thus emerged after the divergence of

204 Apostasioideae and Epidendroideae. The survey of the expression profiles showed that 93 of  
 205 them are not expressed in any of the samples of the map (Fig. S2). Among the ones which are  
 206 expressed most are expressed at very low levels. Higher expression levels are associated with  
 207 reproductive structures, in particular, anthers (Fig. 4).

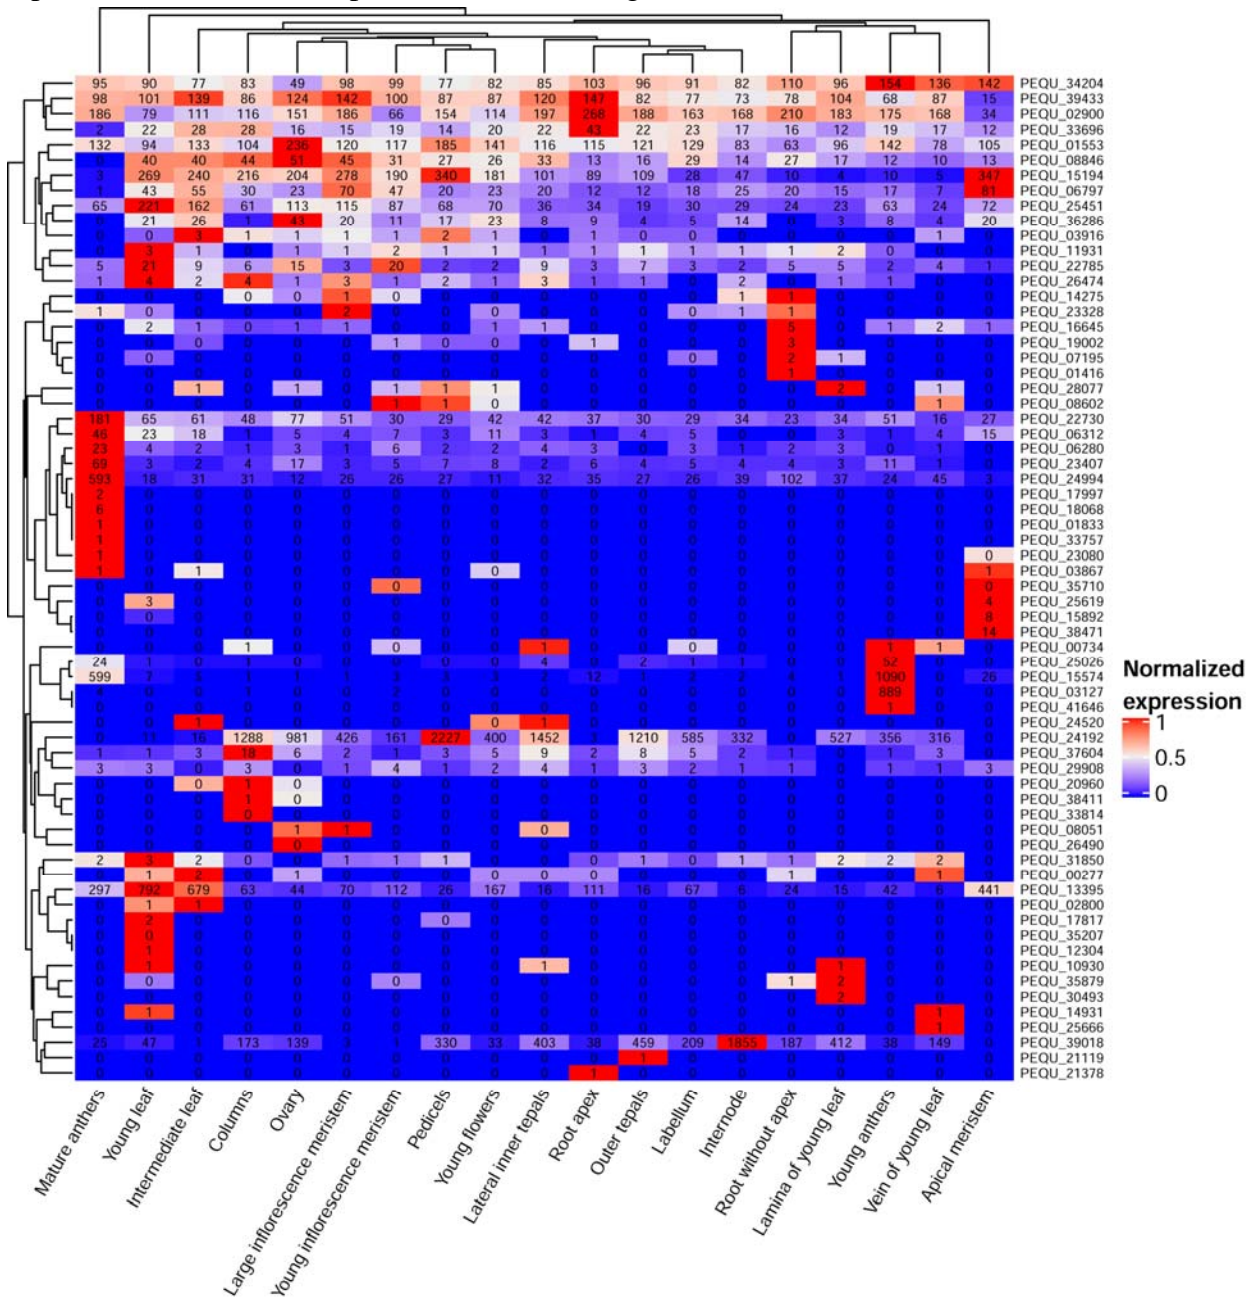

208 **Figure 4.** The heatmap of *P. equestris*-specific genes. Expression levels of each gene in each  
 209 sample were normalized on its maximal expression level for the color key. The numbers on the  
 210 figure represent normalized gene read count averaged over biological replicates.  
 211 Among vegetative structures the most distinct is root (root apex) where three genes –  
 212 *PEQU\_39433*, *PEQU\_02900*, *PEQU\_33696* – have the highest expression levels. *Phalaenopsis*  
 214 roots are unique (compared to most other plants, including *A. schenzhenica*, but not to other



215 epiphytic orchids) in many respects – in particular, they are photosynthetic and develop a special  
216 structure called velamen. Velamen is a tissue of epidermal origin that consists of several layers  
217 of dead cells which help to absorb water and protect photosynthetic tissues of the root from the  
218 UV damage. Notably, *PEQU\_39433* and *PEQU\_33696* do not have homologs in  
219 *A. schenzhenica*. *PEQU\_02900* has a marginal similarity (34%) with *A. schenzhenica* protein  
220 encoded by Ash001570 gene.

221 The topic of orphan genes – the ones that lack detectable homologues in other lineages - is  
222 widely discussed, in particular in application to plants (Arendsee, Li & Wurtele, 2014). While a  
223 part of the orphan genes might represent the artifacts of the annotation, others have a function  
224 (for example, *A. thaliana* orphan gene *QQS* which acts in starch metabolism (Li et al., 2009).  
225 The functional analysis of orphan genes however lags behind the typical genes; they are  
226 overlooked in the annotations based on the homology; they are also usually expressed at lower  
227 levels and in a narrower range of tissues (reviewed in Schlötterer, 2015). The study of expression  
228 levels and patterns of a potential orphan gene is a first step towards its characterization – the  
229 detectable level of expression is an evidence of that the ORF is indeed a gene, not an annotation  
230 artifact.

231 Notably that orphan genes in the well-characterized animal objects (*Drosophila*, primates) have  
232 expression patterns biased towards male reproductive structures (Begun et al., 2007; Xie et al.,  
233 2012). According to the “out-of-testis” hypothesis (Kaessmann, 2010) this is mediated by the  
234 unique epigenetic state of the chromatin during male gametogenesis. We observed the same bias  
235 in *Phalaenopsis*; the growing availability of plant transcriptome maps will enable to find out if  
236 this is universal for plants.

## 237 **Conclusions**

238 In this study we present a transcriptome map of orchid *Phalaenopsis equestris* covering 19  
239 organs at various stages of the development. We identified 521 tissue-specific genes the majority  
240 of which expressed in anthers, roots (11%), and meristems. The uniformly expressed genes were  
241 associated with the similar processes as in *Arabidopsis thaliana*, i.e. vesicles, membranes, RNA  
242 processing and localization. In order to improve reuse of the data we integrated transcriptome  
243 map in our database TraVA and demonstrated its usability in the study of *P. equestris* orphan  
244 genes.

## 245 **Author Contributions**

246 Conceptualization, A.A.P.; Data curation, A.V.K.; Formal analysis, A.V.K. and A.S.K.; Funding  
247 acquisition, A.A.P.; Investigation, A.A.P., M.D.L. and A.V.K.; Methodology, A.A.P and  
248 M.A.E.; Project administration, A.A.P.; Software, A.V.K. and A.S.K.; Supervision, A.A.P.;  
249 Writing—original draft, A.V.K. and M.D.L.; Writing—review & editing, A.A.P., A.V.K. and  
250 M.D.L.

## 251 **Funding**

252 The reported study was funded by RFBR according to the research project № 18-29-13017.

## 253 **Conflicts of Interest**

254 The authors declare no conflict of interest.

255

## 256 **References**

- 257 Anders S, Huber W. 2010. Differential expression analysis for sequence count data. *Genome*  
258 *Biology* 11:R106. DOI: 10.1186/gb-2010-11-10-r106.
- 259 Arendsee ZW, Li L, Wurtele ES. 2014. Coming of age: orphan genes in plants. *Trends in Plant*  
260 *Science* 19:698–708. DOI: 10.1016/j.tplants.2014.07.003.
- 261 Barrett CF, McKain MR, Sinn BT, Ge X-J, Zhang Y, Antonelli A, Bacon CD. 2019. Ancient  
262 Polyploidy and Genome Evolution in Palms. *Genome Biology and Evolution* 11:1501–  
263 1511. DOI: 10.1093/gbe/evz092.
- 264 Begun DJ, Lindfors HA, Kern AD, Jones CD. 2007. Evidence for *de Novo* Evolution of Testis-  
265 Expressed Genes in the *Drosophila yakuba* / *Drosophila erecta* Clade. *Genetics* 176:1131–  
266 1137. DOI: 10.1534/genetics.106.069245.
- 267 Bolger AM, Lohse M, Usadel B. 2014. Trimmomatic: a flexible trimmer for Illumina sequence  
268 data. *Bioinformatics (Oxford, England)* 30:2114–2120. DOI:  
269 10.1093/bioinformatics/btu170.
- 270 Cai J, Liu X, Vanneste K, Proost S, Tsai W-C, Liu K-W, Chen L-J, He Y, Xu Q, Bian C, Zheng  
271 Z, Sun F, Liu W, Hsiao Y-Y, Pan Z-J, Hsu C-C, Yang Y-P, Hsu Y-C, Chuang Y-C,  
272 Dievart A, Dufayard J-F, Xu X, Wang J-Y, Wang J, Xiao X-J, Zhao X-M, Du R, Zhang G-  
273 Q, Wang M, Su Y-Y, Xie G-C, Liu G-H, Li L-Q, Huang L-Q, Luo Y-B, Chen H-H, Van de  
274 Peer Y, Liu Z-J. 2015. The genome sequence of the orchid *Phalaenopsis equestris*. *Nature*  
275 *Genetics* 47:65–72. DOI: 10.1038/ng.3149.
- 276 Chen J-C, Tong C-G, Lin H-Y, Fang S-C. 2019. *Phalaenopsis LEAFY COTYLEDON1*-Induced  
277 Somatic Embryonic Structures Are Morphologically Distinct From Protocorm-Like  
278 Bodies. *Frontiers in Plant Science* 10:1594. DOI: 10.3389/fpls.2019.01594.
- 279 Cozzolino S, Widmer A. 2005. Orchid diversity: an evolutionary consequence of deception?  
280 *Trends in Ecology & Evolution* 20:487–494. DOI: 10.1016/j.tree.2005.06.004.
- 281 Dobin A, Davis CA, Schlesinger F, Drenkow J, Zaleski C, Jha S, Batut P, Chaisson M, Gingeras  
282 TR. 2013. STAR: ultrafast universal RNA-seq aligner. *Bioinformatics (Oxford, England)*  
283 29:15–21. DOI: 10.1093/bioinformatics/bts635.
- 284 Edwards KD, Bombarely A, Story GW, Allen F, Mueller LA, Coates SA, Jones L. 2010.  
285 TobEA: an atlas of tobacco gene expression from seed to senescence. *BMC Genomics*  
286 11:142. DOI: 10.1186/1471-2164-11-142.
- 287 Hsu C-C, Chen W-H. 2016. The breeding achievements from *Phalaenopsis equestris*. In:  
288 *Malayan Orchid Review*. WORLD SCIENTIFIC, 41–47. DOI:  
289 10.1142/9789814749954\_0007.
- 290 Hsu C-C, Su C-J, Jeng M-F, Chen W-H, Chen H-H. 2019. A *HORT1* Retrotransposon Insertion  
291 in the *PeMYB11* Promoter Causes Harlequin/Black Flowers in *Phalaenopsis* Orchids.  
292 *Plant Physiology* 180:1535–1548. DOI: 10.1104/pp.19.00205.
- 293 Kaessmann H. 2010. Origins, evolution, and phenotypic impact of new genes. *Genome Research*  
294 20:1313–1326. DOI: 10.1101/gr.101386.109.

- 295 Klepikova AV, Kasianov AS, Gerasimov ES, Logacheva MD, Penin AA. 2016. A High  
296 Resolution Map of the *Arabidopsis thaliana* Developmental Transcriptome Based on  
297 RNA-seq Profiling. *The Plant Journal*. DOI: 10.1111/tpj.13312.
- 298 Klepikova AV, Penin AA. 2019. Gene Expression Maps in Plants: Current State and Prospects.  
299 *Plants* 8:309. DOI: 10.3390/plants8090309.
- 300 Koh KW, Lu H-C, Chan M-T. 2014. Virus resistance in orchids. *Plant Science* 228:26–38. DOI:  
301 10.1016/j.plantsci.2014.04.015.
- 302 Li L, Foster CM, Gan Q, Nettleton D, James MG, Myers AM, Wurtele ES. 2009. Identification  
303 of the novel protein QQS as a component of the starch metabolic network in *Arabidopsis*  
304 leaves. *The Plant Journal* 58:485–498. DOI: 10.1111/j.1365-313X.2009.03793.x.
- 305 Lin Y-F, Chen Y-Y, Hsiao Y-Y, Shen C-Y, Hsu J-L, Yeh C-M, Mitsuda N, Ohme-Takagi M,  
306 Liu Z-J, Tsai W-C. 2016. Genome-wide identification and characterization of *TCP* genes  
307 involved in ovule development of *Phalaenopsis equestris*. *Journal of Experimental Botany*  
308 67:5051–5066. DOI: 10.1093/jxb/erw273.
- 309 Niu S-C, Xu Q, Zhang G-Q, Zhang Y-Q, Tsai W-C, Hsu J-L, Liang C-K, Luo Y-B, Liu Z-J.  
310 2016. De novo transcriptome assembly databases for the butterfly orchid *Phalaenopsis*  
311 *equestris*. *Scientific Data* 3:160083. DOI: 10.1038/sdata.2016.83.
- 312 Nobuta K, Venu RC, Lu C, Beló A, Vemaraju K, Kulkarni K, Wang W, Pillay M, Green PJ,  
313 Wang G, Meyers BC. 2007. An expression atlas of rice mRNAs and small RNAs. *Nature*  
314 *Biotechnology* 25:473–477. DOI: 10.1038/nbt1291.
- 315 Penin AA, Klepikova AV, Kasianov AS, Gerasimov ES, Logacheva MD. 2019. Comparative  
316 Analysis of Developmental Transcriptome Maps of *Arabidopsis thaliana* and *Solanum*  
317 *lycopersicum*. *Genes* 10:50. DOI: 10.3390/genes10010050.
- 318 Schlötterer C. 2015. Genes from scratch – the evolutionary fate of de novo genes. *Trends in*  
319 *Genetics* 31:215–219. DOI: 10.1016/j.tig.2015.02.007.
- 320 Schug J, Schuller W-P, Kappen C, Salbaum JM, Bucan M, Stoeckert CJ. 2005. Promoter  
321 features related to tissue specificity as measured by Shannon entropy. *Genome Biology*  
322 6:R33. DOI: 10.1186/gb-2005-6-4-r33.
- 323 Sekhon RS, Briskine R, Hirsch CN, Myers CL, Springer NM, Buell CR, de Leon N, Kaeppler  
324 SM. 2013. Maize Gene Atlas Developed by RNA Sequencing and Comparative Evaluation  
325 of Transcriptomes Based on RNA Sequencing and Microarrays. *PLoS ONE* 8:e61005.  
326 DOI: 10.1371/journal.pone.0061005.
- 327 Silvera K, Santiago LS, Cushman JC, Winter K. 2009. Crassulacean Acid Metabolism and  
328 Epiphytism Linked to Adaptive Radiations in the Orchidaceae. *Plant Physiology*  
329 149:1838–1847. DOI: 10.1104/pp.108.132555.
- 330 Stelpflug SC, Sekhon RS, Vaillancourt B, Hirsch CN, Buell CR, de Leon N, Kaeppler SM. 2016.  
331 An Expanded Maize Gene Expression Atlas based on RNA Sequencing and its Use to  
332 Explore Root Development. *The Plant Genome* 9:0. DOI:  
333 10.3835/plantgenome2015.04.0025.

- 334 Valoroso MC, Sobral R, Saccone G, Salvemini M, Costa MMR, Aceto S. 2019. Evolutionary  
335 Conservation of the Orchid MYB Transcription Factors DIV, RAD, and DRIF. *Frontiers*  
336 *in Plant Science* 10:1359. DOI: 10.3389/fpls.2019.01359.
- 337 Wang L, Xie W, Chen Y, Tang W, Yang J, Ye R, Liu L, Lin Y, Xu C, Xiao J, Zhang Q. 2010. A  
338 dynamic gene expression atlas covering the entire life cycle of rice. *The Plant Journal*  
339 61:752–766. DOI: 10.1111/j.1365-313X.2009.04100.x.
- 340 Xie C, Zhang YE, Chen J-Y, Liu C-J, Zhou W-Z, Li Y, Zhang M, Zhang R, Wei L, Li C-Y.  
341 2012. Hominoid-Specific De Novo Protein-Coding Genes Originating from Long Non-  
342 Coding RNAs. *PLoS Genetics* 8:e1002942. DOI: 10.1371/journal.pgen.1002942.
- 343 Yao S, Jiang C, Huang Z, Torres-Jerez I, Chang J, Zhang H, Udvardi M, Liu R, Verdier J. 2016.  
344 The *Vigna unguiculata* Gene Expression Atlas (VuGEA) from *de novo* assembly and  
345 quantification of RNA-seq data provides insights into seed maturation mechanisms. *The*  
346 *Plant Journal* 88:318–327. DOI: 10.1111/tpj.13279.
